# Supplementary material for: Resurgence of Dengue Virus Serotype 4 in Malaysia: A Comprehensive Clinicodemographic and Genomic Analysis
Source: MDPI journal article supplement (doi:10.3390/tropicalmed8080409), 2023-08-11
Supplement: s1 [file s1]

## Supplement S1

Distribution of each serotype by states from 2017-mid 2022.

| States          | 2017   |        |        |        |          |          | 2018   |        |        |        |          |          | 2019   |        |        |        | 2020   |        |        |        |          |          |          |          | 2021   |        |        |        | 2022   |        |        |        |    |
|-----------------|--------|--------|--------|--------|----------|----------|--------|--------|--------|--------|----------|----------|--------|--------|--------|--------|--------|--------|--------|--------|----------|----------|----------|----------|--------|--------|--------|--------|--------|--------|--------|--------|----|
|                 | DENV 1 | DENV 2 | DENV 3 | DENV 4 | DENV 1&2 | DENV 1&3 | DENV 1 | DENV 2 | DENV 3 | DENV 4 | DENV 1&3 | DENV 2&3 | DENV 1 | DENV 2 | DENV 3 | DENV 4 | DENV 1 | DENV 2 | DENV 3 | DENV 4 | DENV 1&2 | DENV 2&3 | DENV 2&4 | DENV 1&4 | DENV 1 | DENV 2 | DENV 3 | DENV 4 | DENV 1 | DENV 2 | DENV 3 | DENV 4 |    |
| Perlis          |        |        | 2      |        |          |          |        |        |        |        |          |          | 0      | 0      | 0      | 0      | 0      | 0      | 0      | 0      |          |          |          |          |        |        |        |        | 0      | 0      | 0      | 0      |    |
| Kedah           |        | 1      |        |        |          |          | 4      | 10     | 10     |        | 1        |          | 4      | 5      | 8      | 0      | 1      | 0      | 4      | 0      |          | 1        |          |          |        |        |        |        | 1      | 1      | 0      | 0      | 16 |
| Penang          |        |        |        |        |          |          |        |        |        |        |          |          | 0      | 0      | 0      | 0      | 0      | 0      | 0      | 0      |          |          |          |          |        |        |        |        | 0      | 0      | 0      | 0      |    |
| Perak           | 2      | 3      | 12     | 4      |          |          | 5      | 7      | 14     | 1      |          |          | 0      | 4      | 5      | 0      | 0      | 1      | 0      | 0      |          |          |          |          |        |        |        |        | 0      | 0      | 0      | 0      |    |
| Selangor        | 16     | 19     | 34     | 6      |          | 1        | 3      | 28     | 24     | 1      |          | 1        | 13     | 24     | 13     | 0      | 21     | 34     | 33     | 7      |          |          |          |          |        | 1      |        | 6      | 0      | 2      | 0      | 14     |    |
| Kuala Lumpur    | 14     | 26     | 49     | 2      | 1        |          | 2      | 9      | 7      |        |          | 1        | 0      | 1      | 0      | 0      | 6      | 3      | 3      | 0      |          |          |          |          |        |        |        |        | 1      | 0      | 1      | 0      | 0  |
| Negeri Sembilan |        |        |        |        |          |          |        |        |        |        |          |          | 0      | 0      | 0      | 0      | 0      | 0      | 0      | 0      |          |          |          |          |        |        |        |        | 1      | 0      | 0      | 0      | 0  |
| Melaka          |        | 1      |        |        |          |          |        |        | 1      |        |          |          | 1      | 3      | 1      | 0      | 4      | 5      | 11     | 0      |          |          |          |          |        |        | 3      | 1      | 0      | 0      | 0      | 1      |    |
| Johor           | 1      | 5      | 4      |        |          |          |        | 1      | 2      |        |          |          | 3      | 12     | 10     | 1      | 26     | 69     | 53     | 11     | 2        | 5        | 1        | 1        |        | 1      |        |        | 0      | 0      | 0      | 0      | 2  |
| Pahang          |        |        |        |        |          |          |        |        |        |        |          |          | 0      | 3      | 0      | 0      | 0      | 1      | 2      | 0      |          |          |          |          |        |        |        |        | 0      | 0      | 0      | 0      |    |
| Terengganu      |        |        |        |        |          |          |        |        |        |        |          |          | 0      | 0      | 0      | 0      | 0      | 0      | 0      | 0      |          |          |          |          |        |        |        |        | 0      | 0      | 0      | 0      |    |
| Kelantan        |        |        |        |        |          |          |        |        |        |        |          |          | 0      | 0      | 1      | 0      | 0      | 0      | 0      | 0      |          |          |          |          |        |        |        |        | 0      | 0      | 0      | 0      |    |
| Sarawak         | 1      |        |        |        |          |          |        | 1      |        |        |          |          | 0      | 1      | 1      | 0      | 0      | 2      | 0      | 0      |          |          |          |          |        |        |        |        | 0      | 0      | 0      | 0      |    |
| Putrajaya       |        |        | 1      |        |          |          | 1      |        |        |        |          |          | 0      | 0      | 0      | 0      | 0      | 0      | 0      | 0      |          |          |          |          |        |        |        |        | 0      | 0      | 0      | 0      |    |
| Sabah           |        | 1      |        |        |          |          |        | 1      | 3      |        |          |          | 1      | 0      | 1      | 0      | 2      | 0      | 1      | 0      |          |          |          |          |        |        |        |        | 0      | 0      | 0      | 0      |    |
| Labuan          |        |        |        |        |          |          |        |        |        |        |          |          | 0      | 0      | 0      | 0      | 0      | 0      | 0      | 0      |          |          |          |          |        |        |        |        | 0      | 0      | 0      | 0      |    |
| Total           | 34     | 56     | 102    | 12     | 1        | 1        | 15     | 57     | 61     | 2      | 1        | 2        | 22     | 53     | 40     | 1      | 60     | 115    | 107    | 18     | 2        | 6        | 1        | 1        | 0      | 2      | 3      | 9      | 1      | 3      | 0      | 0      | 33 |
